# Supplementary material
Source: Springer Nature journal article supplement (https://www.springermedizin.de/resource/supplementary/12889_2013_5851_MOESM6_ESM.pdf/9496392)
Supplement: MOESM6 [file 9496392]

**ISCOLE Principal Investigators**  
Peter T. Katzmarzyk and Timothy S. Church

**External Advisory Board**

- assess overall progress, rigor and objectivity of ISCOLE
- provide an unbiased assessment of the science and role of the sponsor

**Coordinating Center**  
**Pennington Biomedical Research Center**

- protocol development
- regulatory oversight
- training of personnel
  - quality control
- study administration
  - logistics
  - biostatistics

**Project Committees**

- Ancillary Studies Committee
- Publications Committee
- Education Committee
- Accelerometer Analysis Committee

**12 Study Site Principal Investigators**

- site-specific protocol development
  - data collection
- regulatory compliance

**Data Management Center**  
**Wake Forest University**

- develop and maintain web-based data entry and management platform
